# Supplementary material for: Combined effect of ozone and household air pollution on COPD in people aged less than 50 years old
Source: PubMed Central journal article supplement — Thorax. 2023 Oct 18;79(1):35–42. doi: 10.1136/thorax-2022-219691 (PMC10804043; doi:10.1136/thorax-2022-219691), 2023-10-18
Supplement: thorax-2022-219691supp001.pdf [file thorax-2022-219691supp001.pdf]

**e-Figure 1. Flow of participants through the study.**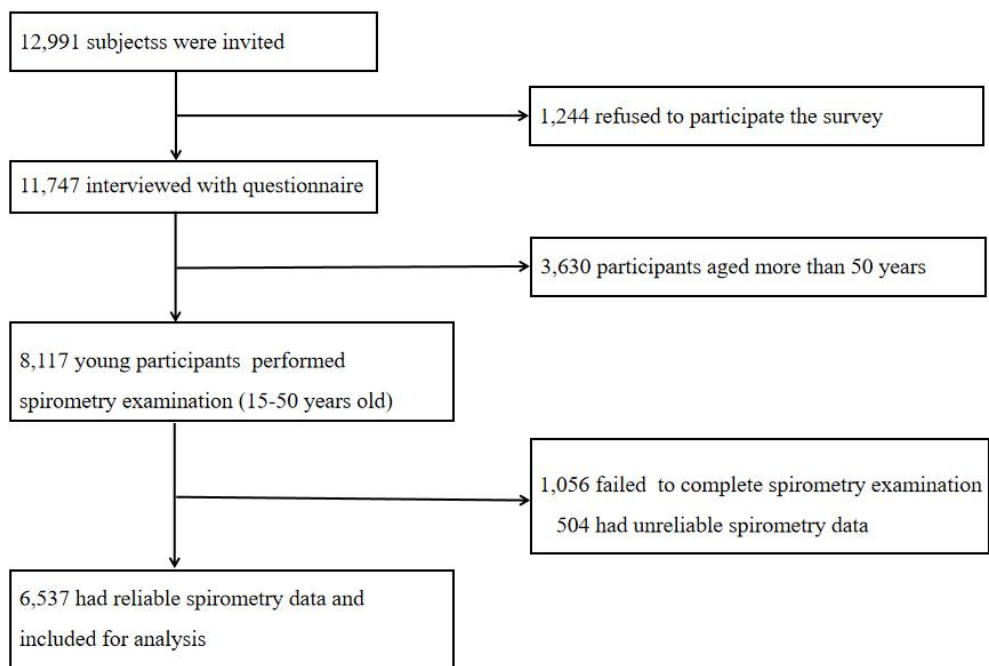

**e-Table 1. Characteristics of participants with small airway dysfunction aged less than 50 years.**

|                                   | <b>Non-SAD<br/>(n=4,161)</b> | <b>SAD<br/>(n=1,807)</b> | <b>P value</b> |
|-----------------------------------|------------------------------|--------------------------|----------------|
| <b>Exposures</b>                  |                              |                          |                |
| Cigarette smoking                 |                              |                          |                |
| Never-smoker                      | 3020 (72.6%)                 | 1343 (74.3%)             | 0.173          |
| Ever-smoker                       | 1141 (27.4%)                 | 464 (25.7%)              |                |
| History of TB                     | 187 (4.5%)                   | 105 (5.8%)               | 0.036          |
| Household air pollution           | 2734 (65.7%)                 | 1352 (74.8%)             | <0.001         |
| Occupational exposure             | 377 (9.4%)                   | 225 (12.8%)              | <0.001         |
| O <sub>3</sub> exposure, ppb      | 68.57 (11.19)                | 71.02 (10.09)            | <0.001         |
| <b>Lung function parameters</b>   |                              |                          |                |
| FVC pre-BD % pred                 | 103.35 (19.11)               | 97.64 (20.89)            | <0.001         |
| FVC post-BD % pred                | 102.88 (18.92)               | 97.53 (17.68)            | <0.001         |
| FEV <sub>1</sub> pre-BD % pred    | 104.71 (17.35)               | 85.17 (15.05)            | <0.001         |
| FEV <sub>1</sub> post-BD % pred   | 105.75 (18.30)               | 92.12 (15.89)            | <0.001         |
| FEV <sub>1</sub> /FVC post-BD, %  | 87.70 (6.30)                 | 80.75 (6.08)             | <0.001         |
| MMEF pre-BD % pred                | 87.58 (23.88)                | 48.18 (12.78)            | <0.001         |
| MMEF post-BD % pred               | 93.52 (59.67)                | 64.07 (50.30)            | <0.001         |
| FEF <sub>50%</sub> pre-BD % pred  | 97.01 (22.32)                | 60.22 (15.66)            | <0.001         |
| FEF <sub>50%</sub> post-BD % pred | 102.05 (26.06)               | 75.84 (19.95)            | <0.001         |
| FEF <sub>75%</sub> pre-BD % pred  | 98.55 (33.80)                | 50.35 (16.82)            | <0.001         |
| FEF <sub>75%</sub> post-BD % pred | 106.92 (38.30)               | 67.78 (27.14)            | <0.001         |
| <b>Respiratory symptoms</b>       |                              |                          |                |
| Cough                             | 343 (8.3%)                   | 158 (8.8%)               | 0.613          |
| Sputum                            | 354 (8.6%)                   | 136 (7.6%)               | 0.194          |
| Recurrent wheezing                | 95 (2.3%)                    | 69 (3.8%)                | 0.001          |
| Apnea                             | 666 (16.2%)                  | 287 (16.0%)              | 0.836          |
| <b>History of asthma</b>          | 98 (2.4%)                    | 77 (4.3%)                | <0.001         |

Data are expressed as number (%) or mean (standard deviation, SD). HAP: Household air pollution.

TB: Tuberculosis. O<sub>3</sub>: Ozone. pre-BD: pre-bronchodilator. post-BD: post-bronchodilator. FVC: Forced vital capacity. FEV<sub>1</sub>: Forced expiratory volume in the first second. MMEF: Maximum mid-expiratory flow. FEF: Forced expiratory flow.

**e-Table 2. The prevalence (%) of chronic obstructive pulmonary disease among the residents aged less than 50 years.**

| Variables                    | Overall              |                                | Men                  |                                | Women                |                                |
|------------------------------|----------------------|--------------------------------|----------------------|--------------------------------|----------------------|--------------------------------|
|                              | Cases/total<br>(n/N) | Prevalence of COPD<br>(95% CI) | Cases/total<br>(n/N) | Prevalence of COPD<br>(95% CI) | Cases/total<br>(n/N) | Prevalence of COPD<br>(95% CI) |
| <b>Prevalence</b>            | 511/6537             | 7.8 (7.2-8.5%)                 | 263/3256             | 8.1 (7.2-9.1%)                 | 248/3281             | 7.6 (6.7-8.5%)                 |
| <b>Age, years</b>            |                      |                                |                      |                                |                      |                                |
| 15–30                        | 127/2578             | 4.9 (4.1-5.8%)                 | 65/1418              | 4.6 (3.6-5.8%)                 | 62/1160              | 5.3 (4.1-6.8%)                 |
| 31–40                        | 151/1980             | 7.6 (6.5-8.9%)                 | 73/942               | 7.7 (6.1-9.6%)                 | 78/1038              | 7.5 (6.0-9.3%)                 |
| 41–50                        | 233/1979             | 11.8 (10.4-13.3%)              | 125/896              | 14.0 (11.7-16.4%)              | 108/1083             | 10.0 (8.3-11.9%)               |
| <i>P for trend</i>           |                      | <0.001                         |                      | <0.001                         |                      | <0.001                         |
| <b>Education attainment</b>  |                      |                                |                      |                                |                      |                                |
| Primary school and lower     | 211/2271             | 9.3 (8.1-10.6%)                | 109/935              | 11.7 (9.7-13.9%)               | 102/1336             | 7.6 (6.3-9.2%)                 |
| Middle and high school       | 230/2980             | 7.9 (7.0-9.0%)                 | 120/1547             | 7.8 (6.5-9.2%)                 | 110/1361             | 8.1 (6.7-9.7%)                 |
| College and higher           | 70/1358              | 5.2 (4.0-6.5%)                 | 34/774               | 4.4 (3.1-6.1%)                 | 36/584               | 6.2 (4.4-8.4%)                 |
| <i>P for trend</i>           |                      | <0.001                         |                      | <0.001                         |                      | 0.337                          |
| <b>BMI, kg/m<sup>2</sup></b> |                      |                                |                      |                                |                      |                                |
| <18.5                        | 15/441               | 3.4 (1.9-5.5%)                 | 7/206                | 3.4 (1.4-6.9%)                 | 8/235                | 3.4 (1.5-6.6%)                 |
| 18.5-24.9                    | 291/3673             | 7.9 (7.1-8.8%)                 | 147/1772             | 8.3 (7.1-9.7%)                 | 144/1901             | 7.6 (6.4-8.9%)                 |
| ≥25.0                        | 205/2423             | 8.5 (7.4-9.6%)                 | 109/1278             | 8.5 (7.1-10.2%)                | 96/1145              | 8.4 (6.8-10.1%)                |
| <i>P for trend</i>           |                      | 0.001                          |                      | 0.038                          |                      | 0.031                          |
| <b>Cigarette smoking</b>     |                      |                                |                      |                                |                      |                                |
| Never-smoker                 | 358/4757             | 7.5 (6.8-8.3%)                 | 112/1553             | 7.2 (6.0-8.6%)                 | 246/3204             | 7.7 (6.8-8.7%)                 |
| Ever-smoker                  | 153/1777             | 8.6 (7.3-10.0%)                | 151/1703             | 8.9 (7.6-10.3%)                | 2/74                 | 2.7 (0.3-9.4%)                 |
| <i>P for difference</i>      |                      | 0.146                          |                      | 0.083                          |                      | 0.109                          |
| <b>History of TB</b>         |                      |                                |                      |                                |                      |                                |
| Yes                          | 33/327               | 10.1 (7.0-13.9%)               | 21/179               | 11.7 (7.4-17.4%)               | 12/148               | 8.1 (4.3-13.7%)                |
| No                           | 478/6210             | 7.7 (7.0-8.4%)                 | 242/3077             | 7.9 (6.9-8.9%)                 | 236/3133             | 7.5 (6.6-8.5%)                 |
| <i>P for difference</i>      |                      | 0.115                          |                      | 0.064                          |                      | 0.795                          |

|                                |          |                   |          |                   |          |                   |
|--------------------------------|----------|-------------------|----------|-------------------|----------|-------------------|
| <b>Household air pollution</b> |          |                   |          |                   |          |                   |
| Yes                            | 424/4551 | 9.3 (8.5-10.2%)   | 214/2156 | 9.9 (8.7-11.3%)   | 210/2395 | 8.8 (7.7-10.0%)   |
| No                             | 87/1986  | 4.4 (3.5-5.4%)    | 49/1100  | 4.5 (3.3-5.8%)    | 38/886   | 4.3 (3.1-5.8%)    |
| <i>P for difference</i>        |          | <0.001            |          | <0.001            |          | <0.001            |
| <b>Occupational exposure</b>   |          |                   |          |                   |          |                   |
| Yes                            | 62/668   | 9.3 (7.2-11.7%)   | 35/312   | 11.2 (7.9-15.3%)  | 27/356   | 7.6 (5.1-10.8%)   |
| No                             | 431/5656 | 7.6 (6.9-8.3%)    | 222/2857 | 7.8 (6.8-8.8%)    | 209/2799 | 7.5 (6.5-8.5%)    |
| <i>P for difference</i>        |          | 0.129             |          | 0.034             |          | 0.936             |
| <b>History of asthma</b>       |          |                   |          |                   |          |                   |
| Yes                            | 24/203   | 11.8 (7.7-17.1%)  | 9/78     | 11.5 (5.5-20.8%)  | 15/125   | 12.0 (6.9-19.0%)  |
| No                             | 487/6334 | 7.7 (7.0-8.4%)    | 254/3178 | 8.0 (7.1-9.0%)    | 233/3156 | 7.4 (6.5-8.4%)    |
| <i>P for difference</i>        |          | 0.030             |          | 0.256             |          | 0.055             |
| <b>SAD</b>                     |          |                   |          |                   |          |                   |
| Yes                            | 426/2233 | 19.1 (17.5-20.8%) | 210/987  | 21.3 (18.8-24.0%) | 216/1246 | 17.3 (15.3-19.6%) |
| No                             | 80/4241  | 1.9 (1.5-2.3%)    | 51/2243  | 2.3 (1.7-3.0%)    | 29/1998  | 1.5 (1.0-2.1%)    |
| <i>P for difference</i>        |          | <0.001            |          | <0.001            |          | <0.001            |

BMI: Body mass index. TB: Tuberculosis. SAD: Small airway dysfunction.

**e-Figure 2: Prevalence of COPD using lower limit of normal by sex and age group.**

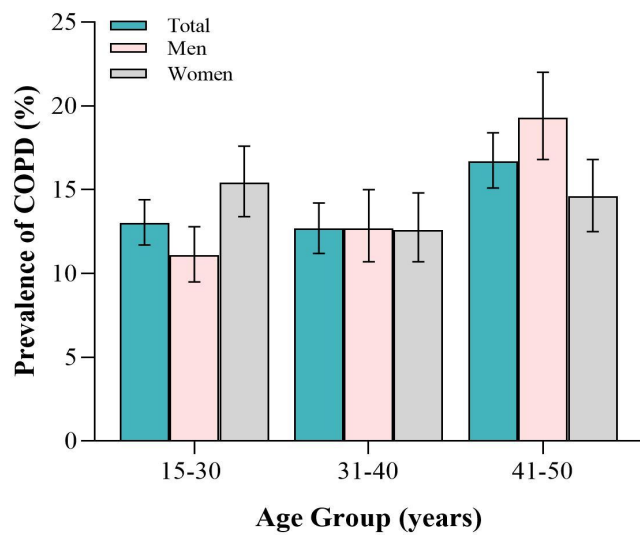

The bar lines indicate 95% CIs.

**e-Table 3. The distributions of symptoms by COPD grades.**

|                             | <b>GOLD I<br/>(n=199)</b> | <b>GOLD II<br/>(n=264)</b> | <b>GOLD III-IV<br/>(n=48)</b> | <b>Total<br/>(n=511)</b> |
|-----------------------------|---------------------------|----------------------------|-------------------------------|--------------------------|
| <b>Respiratory symptoms</b> |                           |                            |                               |                          |
| Cough                       | 18 (9.1%)                 | 25 (9.5%)                  | 3 (6.2%)                      | 46 (9.1%)                |
| Sputum                      | 17 (8.6%)                 | 25 (9.5%)                  | 4 (8.3%)                      | 46 (9.1%)                |
| Recurrent wheezing          | 6 (3.0%)                  | 10 (3.8%)                  | 2 (4.2%)                      | 18 (3.5%)                |
| Apnea                       | 46 (23.4%)                | 33 (12.5%)                 | 8 (16.7%)                     | 87 (17.1%)               |
| At least one of the above   | 58 (29.1%)                | 59 (22.3%)                 | 9 (18.8%)                     | 126 (24.7%)              |
| CAT score                   |                           |                            |                               |                          |
| <10                         | 53 (26.9%)                | 63 (24.0%)                 | 12 (25.0%)                    | 128 (25.2%)              |
| ≥10                         | 144 (73.1%)               | 200 (76.0%)                | 36 (75.0%)                    | 380 (74.8%)              |

Data are expressed as the number (%). GOLD: Global initiative for chronic obstructive pulmonary disease. CAT: COPD assessment test.

**e-Table 4. Adjusted OR (95%CI) for young COPD by multiplicative interaction analysis of ozone and HAP.**

|                                 | <b>OR* (95% CI) of young COPD</b> | <b>p-value for the interaction</b> |
|---------------------------------|-----------------------------------|------------------------------------|
| O <sub>3</sub> -high<br>HAP=yes | 1.26 (0.76-2.07)                  | 0.367                              |

COPD: Chronic obstructive pulmonary disease. HAP: Household air pollution. O<sub>3</sub>: Ozone. OR: Odds ratio. CI: Confidence interval.

\*We controlled for age, sex, BMI and education plus history of asthma, history of TB and environmental exposures (smoking status, and occupational exposure).
